# Supplementary material
Source: ML conference proceedings conference paper supplement (https://openaccess.thecvf.com/content/CVPR2021/html/Ehsani_ManipulaTHOR_A_Framework_CVPR_2021_paper.html)
Supplement: Supplementary file 3 [file Ehsani_ManipulaTHOR_A_Framework_CVPR_2021_supplemental.zip]

Archive with 4 entries (4 files):
- 03887-supp.pdf
- __MACOSX/._03887-supp.pdf
- 03887-video_small.mp4
- __MACOSX/._03887-video_small.mp4
